1 **Analysis of next- and third-generation RNA-Seq data reveals the structures of**  
2 **alternative transcription units in bacterial genomes**

3 Qi Wang<sup>1</sup>, Zhaoqian Liu<sup>1,2</sup>, Bo Yan<sup>3</sup>, Wen-Chi Chou<sup>4</sup>, Laurence Ettwiller<sup>3</sup>, Qin Ma<sup>2,†</sup>, and Bingqiang  
4 Liu<sup>1,†</sup>

5 <sup>1</sup> School of Mathematics, Shandong University, Jinan 250200, China.

6 <sup>2</sup> Department of Biomedical Informatics, College of Medicine, The Ohio State University, Columbus,  
7 OH 43210, USA.

8 <sup>3</sup> New England Biolabs Inc., Ipswich, MA 01938, USA.

9 <sup>4</sup> Infectious Disease and Microbiome Program, Broad Institute of MIT and Harvard, Cambridge, MA  
10 02142, USA.

11 †Corresponding author. Email: [bingqiang@sdu.edu.cn](mailto:bingqiang@sdu.edu.cn) (B.L.); [qin.ma@osumc.edu](mailto:qin.ma@osumc.edu) (Q.M.)

12 **ABSTRACT**

13 Alternative transcription units (ATUs) are dynamically encoded under different conditions or  
14 environmental stimuli in bacterial genomes, and genome-scale identification of ATUs is essential for  
15 studying the emergence of human diseases caused by bacterial organisms. However, it is unrealistic to  
16 identify all ATUs using experimental techniques, due to the complexity and dynamic nature of ATUs.  
17 Here we present the first-of-its-kind computational framework, named SeqATU, for genome-scale ATU  
18 prediction based on next-generation RNA-Seq data. The framework utilizes a convex quadratic

19 programming model to seek an optimum expression combination of all of the to-be-identified ATUs.  
20 The predicted ATUs in *E. coli* reached a precision of 0.77/0.74 and a recall of 0.75/0.76 in the two RNA-  
21 Sequencing datasets compared with the benchmarked ATUs from third-generation RNA-Seq data. We  
22 believe that the ATUs identified by SeqATU can provide fundamental knowledge to guide the  
23 reconstruction of transcriptional regulatory networks in bacterial genomes.

## 24 INTRODUCTION

25 An operon in bacterial genomes is defined as a group of consecutive genes regulated by a common  
26 promoter that all share the same terminator (*I*). Genes in the same operon generally encode proteins  
27 with relevant or similar biological functions; e.g., *lacZ*, *lacY*, and *lacA* in the *lac* operon encode proteins  
28 that help cells use lactose (*1, 2*). With decades of research on bacterial transcriptional regulation, the  
29 operon model has been found to have complex mechanisms that control expression (*3-5*). Multiple  
30 studies have shown that bacterial genes are dynamically transcribed under different triggering  
31 conditions, leading to shared genes among different mRNA transcripts (*6-8*). This dynamic architecture  
32 can be redefined by all of the alternative transcription units (a.k.a., ATUs) (*3, 5*), and more details can be  
33 found in fig. S1.

34 ATU identification is of fundamental importance for understanding the transcriptional regulatory  
35 mechanisms of bacteria, and these dynamic structures have been demonstrated to be associated with  
36 human diseases (*9-12*). For example, Bhat *et al.* studied the *alr-groEL1* operon, which is essential for the  
37 survival or virulence of *M. tuberculosis* (*9, 11*), the causative agent of tuberculosis (TB), and found that

38 the regulation of the sub-operon is distinct from the main operon (*alr-groEL1* operon) under stress,  
39 especially during heat shock, pH, and SDS stresses (9). Another example is *Helicobacter pylori*, a  
40 gastric pathogen that is the primary known risk factor for gastric cancer (12). Sharma *et al.* found an  
41 acid-induced sub-operon *cag22-18* transcribed from the primary *cag25-18* operon in the *cag*  
42 pathogenicity island of the *H. pylori* genome under acid stress (10). The mechanism of the complex ATU  
43 structure in these pathogenic bacteria can help us to study the emergence of human diseases caused by  
44 bacterial organisms.

45 Several newly developed techniques have provided a comprehensive view of the *E. coli*  
46 transcriptome by identifying full-length primary transcripts (13-17). For example, SMRT-Cappable-seq  
47 (6) combines the isolation of the full-length bacterial primary transcriptome with PacBio SMRT (Single  
48 Molecule, Real-Time) sequencing (6), and simultaneous 5' and 3' end sequencing (SEnd-seq) (7)  
49 captures both transcription start sites (TSSs) and transcription termination sites (TTSs) via  
50 circularization of transcripts (17). Despite the great progress in experimental techniques, there are still  
51 some deficiencies. On the one hand, the read depth and error rate of the third-generation sequencing  
52 used in SMRT-Cappable-seq have an impact on ATU prediction compared with Illumina-based RNA-  
53 Seq (7, 18). On the other hand, the time-consuming, laborious, and costly properties of these  
54 experimental techniques make them unrealistic to be generally applicable to ATU predictions in bacteria  
55 under specific conditions. Thus, novel and robust computational methods for ATU identification in  
56 bacterial genomes based on RNA-Seq are urgently needed.

57 Fortunately, many computational studies have been carried out to predict ATUs in bacteria, which  
58 have provided some preliminary studies for ATU prediction. Several public databases, such as  
59 RegulonDB (19), DBTBS(20), MicrobesOnline (21), DOOR (22, 23), OperomeDB (24), DMINDA 2.0  
60 (25), and ProOpDB (26), provide various levels of operon information and small amounts of ATU  
61 information. However, these databases cannot provide genome-scale ATU information under specific  
62 conditions. Some computational studies, including Rockhopper (27), SeqTU (4, 28), BAC-  
63 BROWSER(29), rSeqTU (5), and Operon-mapper (30), utilize machine learning and model integration  
64 methods based on genomic information and gene expression profiles to identify bacterial transcription  
65 architecture. However, these works still cannot solve the dynamic patterns and overlapping nature of  
66 ATUs.

67 Here, we present SeqATU, a novel computational method for genome-scale ATU prediction by  
68 analyzing next- and third-generation RNA-Seq data (Fig. 1 and table S1). SeqATU utilizes a convex  
69 quadratic programming model (CQP) and aims to provide the optimum expression combination of all of  
70 the to-be-identified ATUs. Specifically, CQP minimizes the squared error between the predicted  
71 expression level of ATUs and the actual expression levels in genetic and intergenic regions. It is  
72 noteworthy that SeqATU also utilizes the information about the bias rate function in modeling non-  
73 uniform read distribution as the linear constraints of CQP to profile the complexity of the ATU  
74 architecture. Overall, SeqATU provides a generalized framework for the inference of ATUs based on  
75 next-generation RNA-Seq data collected under multiple conditions and can be easily applied to any

76 bacterial organism to identify the ATU architecture and construct a transcriptional regulatory network.

77 Please place Fig. 1 here.

## 78 **MATERIALS AND METHODS**

### 79 **Data collection**

80 The two Cappable RNA-Seq datasets used in this study, M9Enrich\_Seq and RiEnrich\_Seq, were  
81 obtained from *E. coli* grown under two different conditions: M9 minimal medium and Rich medium,  
82 respectively (6). The full-length primary transcripts were enriched as described in (6) with modifications  
83 to be adapted to Illumina sequencing. The capping and polyA tailing were performed as described in (6).  
84 The capped RNA was enriched using hydrophilic streptavidin magnetic beads (New England Biolabs)  
85 and eluted with Biotin using the same condition (6). Differently, the eluted RNA was enriched once  
86 more using streptavidin beads to further remove processed RNA (e.g., rRNA). Subsequently, the eluted  
87 RNA was used for library preparation using NEBNext Ultra II directional RNA library prep kit (E7760).  
88 Sequencing was performed on the Illumina Miseq system (paired-end, 100bp). All reads were mapped to  
89 the *E. coli* genome using Burrows-Wheeler Aligner (BWA) with the default parameters (31). Read  
90 alignment and other computational analyses were carried out using the *E. coli* genome NC\_000913.3,  
91 and the corresponding gene annotations (GCF\_000005845.2\_ASM584v2\_genomic.gff) were  
92 downloaded from NCBI. Two experimentally verified ATU datasets, SMRT\_M9Enrich and  
93 SMRT\_RiEnrich, were used as the benchmark data to evaluate the predicted ATUs, which were

94 generated by SMRT-Cappable-seq under the same conditions as the Illumina datasets M9Enrich\_Seq  
95 and RiEnrich\_Seq, respectively (6). In addition, the ATUs defined by RegulonDB (19) and SEnd-seq (7)  
96 were also used as additional evaluation data in our study.

### 97 **Calculation of the expression values of genetic and intergenic regions**

98 After the RNA-Seq reads in M9Enrich\_Seq and RiEnrich\_Seq were mapped to the *E. coli* genome using  
99 BWA, we determined the number of reads  $N(l)$  covering each genomic position  $l$ . Suppose that  $g_i$   
100 and  $g_{i+1}$  are two consecutive genes on the same strand; we denote the expression value of  $g_i$  as  $c_i$   
101 and the expression value of the intergenic region between genes  $g_i$  and  $g_{i+1}$  as  $b_{i,i+1}$ . Then, the  
102 calculation of  $c_i$  and  $b_{i,i+1}$  is given by:

$$c_i = \frac{\sum_{k \in g_i} N(k)}{|g_i|} \quad (1)$$

$$b_{i,i+1} = \frac{\sum_{l \in g_{i,i+1}} N(l)}{|g_{i,i+1}|} \quad (2)$$

103 where  $k \in g_i$  denotes that genomic position  $k$  is on the gene  $g_i$  and  $|g_i|$  denotes the genomic  
104 length of  $g_i$ .

### 105 **Modeling non-uniform read distribution along mRNA transcripts**

106 We introduced the bias rate function, which is similar to the bias curves in the work of Wu *et al.* (32), to  
107 address the non-uniform distribution of the RNA-Seq reads along mRNA transcripts (32-35). The bias  
108 function reflects the relative read distribution bias from the 3' end to the 5' end of an mRNA transcript.

109 We assumed that the maximum read coverage of all the genomic positions of an mRNA transcript is the  
110 expression level without bias. It is noteworthy that a single gene mRNA transcript with no shared gene  
111 among different mRNA transcripts can serve as the ideal template for modeling non-uniform read  
112 distribution along mRNA transcripts. The specific steps of modeling non-uniform read distribution are  
113 detailed as follows:

114 *Step 1: Single Gene mRNA Transcript Selection.* We selected single gene mRNA transcripts from the  
115 evaluation data and plotted their expression distributions. Specifically, 12 groups of single gene mRNA  
116 transcripts with lengths ranging from 300 to 1,500 bp were selected from the evaluation data (more  
117 details are given in method S1), and each group had ten randomly chosen mRNA transcripts. Apparent  
118 decline trends appeared in the single gene mRNA transcripts with long lengths, ranging from 1,100 to  
119 1,500 bp (fig. S2). The reason for this phenomenon may be that the incomplete transcription and 3' end  
120 degradation or processing induce the enrichment of signal at 5' end of the mRNA transcripts with long  
121 lengths (36, 37). Finally, we plotted the expression distribution of single gene mRNA transcripts with  
122 lengths ranging from 1,100 to 1,500 bp.

123 *Step 2: Acquiring the Bias Rate Function.* We applied nonlinear regression to the expression  
124 distribution of the selected single gene mRNA transcripts and acquired the hypothetical function  $f(x)$ .  
125 Specifically, the  $x$  axis and  $y$  axis of the expression distribution were converted to the distance from  
126 the 3' end of an mRNA transcript and the bias rate of read distribution, respectively. To apply nonlinear  
127 regression to single gene mRNA transcripts with different lengths, normalization was also implemented

128 on  $x$ . Here,  $x = (x_1, x_2, \dots, x_m)$  and  $y = (y_1, y_2, \dots, y_m)$  are defined by:

$$x_i = \begin{cases} \frac{l_m - l_{m-i+1}}{\max_l - l_1} \times 10^3, & \text{forward} \\ \frac{l_i - l_1}{\max_l - l_1} \times 10^3, & \text{reverse} \end{cases} \quad (3)$$

$$y_i = \begin{cases} \frac{N(l_{m-i+1})}{\max_y}, & \text{forward} \\ \frac{N(l_i)}{\max_y}, & \text{reverse} \end{cases} \quad (4)$$

129 where  $m$  denotes the number of genomic positions on an mRNA transcript;  $l = (l_1, l_2, \dots, l_m)$  denotes  
 130 the genomic positions on an mRNA transcript;  $\max_l = l_m$ ;  $N(l_i)$  denotes the expression level of the  
 131 genomic position  $l_i$ , i.e., the number of reads covering the genomic position  $l_i$ ; and  $\max_y$  denotes the  
 132 expression level without bias in an mRNA transcript, which is calculated as  $\max \{N(l_i)\}$ ,  $1 \leq i \leq m$ .

133 We used the function *nls* in R to acquire the hypothetical function  $f(x)$ .

134 *Step 3: Constructing Bias Rate Vectors.* We constructed a genetic or intergenic region bias rate vector  
 135 for each mRNA transcript by calculating the bias rate of all of its component genetic or intergenic  
 136 regions. The bias rate of a genetic or an intergenic region is the average bias rate of all the genomic  
 137 positions that it contains. Considering an mRNA transcript  $T$  and its component gene set  
 138  $\{g_1, g_2, \dots, g_n\}$  (the details of the gene labels are described in method S2), we denoted the genetic  
 139 region bias rate vector as  $\mathbf{u} = (u_1, u_2, \dots, u_n)$ , which was calculated using the formula:

$$u_i = \begin{cases} \frac{\sum_{t=m-i_q+1}^{m-i_p+1} f(x_t)}{x_{m-i_p+1} - x_{m-i_q+1} + 1}, & \text{forward} \\ \frac{\sum_{t=i_p}^{i_q} f(x_t)}{x_{i_q} - x_{i_p} + 1}, & \text{reverse} \end{cases} \quad (5)$$



140 where  $m$  denotes the number of genomic positions on  $T$ ;  $u_i$  denotes the bias rate of  $g_i$  for  $T$ ; and  
141  $L_g = (l_{1p}, l_{1q}, l_{2p}, l_{2q}, \dots, l_{np}, l_{nq})$  is the range of the genomic positions of  $\{g_1, g_2, \dots, g_n\}$ , while the  
142 range of the genomic positions of  $g_i$  is  $[l_{ip}, l_{iq}]$ ,  $1 \leq i \leq n$ . Similarly, the calculation of the intergenic  
143 region bias rate vector  $\mathbf{v} = (v_1, v_2, \dots, v_{n-1})$  is provided in method S3.

#### 144 **Modification of maximal ATU clusters**

145 A maximal ATU cluster is defined as a maximal consecutive gene set such that each pair of its  
146 consecutive genes can be covered by at least one ATU. Similar to ATUs, maximal ATU clusters are also  
147 dynamically composed under different conditions or environmental stimuli in bacterial genomes (5, 38).  
148 Such a maximal ATU cluster can be used as an independent genomic region for ATU prediction, which  
149 alleviates the difficulty in computationally predicting ATUs at the genome scale. The output of our in-  
150 house tool rSeqTU can serve as the maximal ATU cluster data, which lays a solid foundation for ATU  
151 prediction (5). We modified the maximal ATU clusters from rSeqTU: (i) two maximal ATU clusters with  
152 distances less than 40 bp were combined into one cluster and (ii) a maximal ATU cluster was split at the  
153 intergenic region where the opposite-strand genes were located. In addition, we selected the maximal  
154 ATU clusters with expression values over ten (see the details in method S4), according to the study of  
155 Etwiller *et al.* (13).

#### 156 **The mathematical programming model for ATU prediction**

157 The predicted ATU expression profile should be consistent with the observed expression profiles of the

158 genetic and intergenic regions. Therefore, the prediction of the ATU profiles can be modeled as an  
159 optimization problem, which seeks an optimum expression combination of all of the to-be-identified  
160 ATUs to minimize the gap between the predicted ATUs and the observed genetic and intergenic region  
161 expression profiles. Here, a convex quadratic programming model was built to solve this optimization  
162 problem.

163 We denoted a maximal ATU cluster as  $G$ , assuming that it contains the consecutive genes  
164  $\{g_1, \dots, g_n\}$ , and the intergenic regions of these genes are  $\{g_{1,2}, \dots, g_{n-1,n}\}$ . The size of  $G$  is defined as  
165 the number of its component genes  $n$ . Theoretically, there are  $\frac{n \times (n+1)}{2}$  ATUs for  $G$ , and an ATU with  
166 consecutive genes  $\{g_i, g_{i+1}, \dots, g_j\}$  is denoted as  $a^{i,j}$ ; the corresponding expression value is  $x^{i,j}$ ,  $1 \leq$   
167  $i \leq j \leq n$ .

168 For the component gene  $g_k$  of  $G$ , the gap between the gene expression value  $c_k$  and the sum of the  
169 expression level of the ATUs containing it is denoted as  $\tau_k$ , which provides the first  $n$  equality  
170 constraints in our mathematical programming model,  $k = 1, 2, \dots, n$ . Similarly, for the intergenic region  
171  $g_{l,l+1}$  of  $G$ , the gap between the intergenic region expression value  $b_{l,l+1}$  and the sum of the  
172 expression level of the ATUs containing it is denoted as  $\beta_l$ , providing the last  $n - 1$  equality  
173 constraints in our mathematical programming model,  $l = 1, 2, \dots, n - 1$ .

174 The goal of our mathematical programming model is to minimize the square of  $\boldsymbol{\varepsilon} =$   
175  $(\tau_1, \tau_2, \dots, \tau_n, \beta_1, \dots, \beta_{n-1})$ , as the combination of  $x^{i,j}$  with a minimal value of  $\boldsymbol{\varepsilon}\boldsymbol{\varepsilon}^T$  is corresponding to  
176 an optimum expression combination of all ATUs  $a^{i,j}$  for  $G$ ,  $1 \leq i \leq j \leq n$ . Additionally, to control the

177 number of optimal solutions and reduce the false-positive errors, we added an  $L^1$  regularization  $\alpha\|\mathbf{x}\|_1$   
 178 to  $\boldsymbol{\varepsilon}\boldsymbol{\varepsilon}^T$  with  $x^{i,j} \geq 0$ , which is a linear function. Because of the variant expression level of different  
 179 maximal ATU clusters, we used the expression value of  $G$  as  $\alpha$ . In total, the convex quadratic  
 180 programming model with unknown variables  $(\mathbf{x}, \boldsymbol{\varepsilon})$  is shown as follows:

$$\begin{aligned}
 \min \quad & \boldsymbol{\varepsilon}\boldsymbol{\varepsilon}^T + \alpha\|\mathbf{x}\|_1 \\
 \text{s. t.} \quad & \sum_{i=1}^k \sum_{j=k}^n u_{i,k} x^{i,j} = c_k + \tau_k \quad k = 1, 2, \dots, n \\
 & \sum_{i=1}^l \sum_{j=l+1}^n v_{i,l+1} x^{i,j} = b_{l,l+1} + \beta_l \quad l = 1, 2, \dots, n-1 \\
 & \mathbf{x} = (x^{i,j}), \quad x^{i,j} \geq 0 \quad 1 \leq i \leq j \leq n \\
 & \boldsymbol{\varepsilon} = (\tau_1, \tau_2, \dots, \tau_n, \beta_1, \dots, \beta_{n-1}) \quad (6)
 \end{aligned}$$

181 where  $\mathbf{u} = (u_{i,j})$  is the genetic region bias rate vector for  $G$ ,  $u_{i,j}$  is the bias rate of gene  $g_j$  for ATU  
 182  $a^{i,k}$ ,  $1 \leq i \leq j \leq n$ ,  $j \leq k \leq n$ ,  $\mathbf{v} = (v_{p,q})$  is the intergenic region bias rate vector for  $G$ , and  $v_{p,q}$   
 183 is the bias rate of the intergenic region  $g_{q-1,q}$  for ATU  $a^{p,l}$ ,  $1 \leq p < q \leq n$ ,  $q \leq l \leq n$  (see the  
 184 details in method S5).

## 185 Two evaluation methods for ATU prediction

186 In the first evaluation method, precision and recall were defined based on perfect matching (Eqs. 7).  
 187 Perfect matching of two ATUs means that all of their component genes are the same. Here, the true  
 188 positives ( $TP$ ) are the number of predicted ATUs with the same component genes as an ATU in the  
 189 evaluation data; the false positives ( $FP$ ) are the number of predicted ATUs that do not exist in the

190 evaluation data; the false negatives ( $FN$ ) are the number of ATUs that appear in the evaluation data but  
191 not in the prediction results of SeqATU.

$$\begin{aligned} \textit{precision} &= \frac{TP}{TP + FP} \\ \textit{recall} &= \frac{TP}{TP + FN} \end{aligned} \quad (7)$$

192 In the second evaluation method, precision and recall were defined based on relaxed matching, which  
193 is measured by the similarity of two ATUs. Assuming that an ATU  $t$  is in one of two datasets (the  
194 predicted ATU dataset and evaluated ATU dataset), the definition and calculation of the similarity of  $t$   
195 are shown in the following three cases:

196 *Case 1:* If  $t$  shares boundary genes at both ends of an ATU in the other dataset, i.e., all component  
197 genes of  $t$  are the same as one in the other dataset, then  $\textit{similarity}(t) = 1$ .

198 *Case 2:* If  $t$  shares exactly one boundary gene of ATUs in the other dataset, then we denote  $U_a$  as  
199 the ATUs in the other dataset that share the 5'-end gene with  $t$  and denoted  $U_b$  as the ATUs in the  
200 other dataset that share the 3'-end gene with  $t$ ,  $U_a \cap U_b = \emptyset$ , one of  $U_a$  and  $U_b$  can be empty. Then,

$$\textit{similarity}(t) = \frac{1}{2} \max_{t' \in U_a} \frac{\alpha(t')}{\beta(t')} + \frac{1}{2} \max_{t' \in U_b} \frac{\alpha(t')}{\beta(t')} \quad (8)$$

201 where  $\alpha(t')$  is the number of shared genes of  $t$  and  $t'$  and  $\beta(t')$  is the maximal size of  $t$  and  $t'$ .

202 *Case 3:* If  $t$  shares no boundary genes at both ends of the ATUs in the other dataset, then  
203  $\textit{similarity}(t) = 0$ .

204 Finally, the precision and recall based on relaxed matching are calculated by the following formula:

$$\textit{precision} = \frac{\sum_{t \in T_1} \textit{similarity}(t)}{n_1}$$

$$recall = \frac{\sum_{t \in T_2} similarity(t)}{n_2} \quad (9)$$

205 where  $T_1$  is the set of predicted ATUs,  $n_1$  is the number of predicted ATUs,  $T_2$  is the set of evaluated  
206 ATUs, and  $n_2$  is the number of evaluated ATUs.

## 207 **RESULTS**

### 208 **A reliable bias rate function is acquired in modeling non-uniform read distribution along mRNA** 209 **transcripts**

210 To ensure the reliability of the bias rate function in modeling non-uniform read distribution, we selected  
211 four single gene mRNA transcript datasets randomly from the two evaluation datasets  
212 (SMRT\_M9Enrich and SMRT\_RiEnrich), named M9Enrich\_1, M9Enrich\_2, RiEnrich\_1, and  
213 RiEnrich\_2. Four bias rate functions, which are exponential functions, were generated after conducting  
214 nonlinear regression on the mRNA transcripts across these four datasets (Fig. 2). We found that these  
215 bias rate functions were similar ( $R^2 > 0.998$ ) when we evaluated the R-square statistic (for more  
216 details, see method S6 and table S2). The similarity of the four bias rate functions indicated that the  
217 selection of the single gene mRNA transcript datasets had little impact on modeling non-uniform read  
218 distribution along mRNA transcripts, implying the universal common non-uniform read distribution of  
219 different mRNA transcripts of *E. coli*. Specifically, we used the average of these four coefficients as the  
220 final coefficients of the exponential function, which was  $f(x) = ae^{bx}$  with  $a = 0.256$  and  $b =$   
221  $0.00128$ .

222 Please place Fig. 2 here.

223 **ATUs predicted by SeqATU reach precision and recall over 0.64**

224 The performance evaluation was conducted by comparing the predicted ATUs with the ATUs in  
225 SMRT\_M9Enrich and SMRT\_RiEnrich, which were generated based on the third-generation sequencing  
226 and are not sensitive to transcripts with low expression levels. For a more accurate and fair evaluation,  
227 maximal ATU clusters after pre-selection were retained in the subsequent evaluations (more details  
228 about the pre-selection of maximal ATU clusters can be seen in method S7 and fig. S3).

229 The precision and recall of the predicted ATUs were calculated for each maximal ATU cluster. By  
230 considering only perfect matching, the average precision and recall were 0.67 and 0.67 for  
231 M9Enrich\_Seq and 0.64 and 0.68 for RiEnrich\_Seq, respectively. When using relaxed matching, the  
232 average precision and recall increased to 0.77 and 0.75 for M9Enrich\_Seq and 0.74 and 0.76 for  
233 RiEnrich\_Seq, respectively. The statistics for precision and recall on maximal ATU clusters with  
234 different sizes, as shown in Fig. 3A and fig. S4A. These results showed that the average precision and  
235 recall were decreasing with the increasing size of maximal ATU clusters (other than several large size  
236 ones due to their small number of counts). The results also indicated that the evaluation results based on  
237 relaxed matching were significantly higher than those based on perfect matching across different sizes.  
238 This result implied that the incorrectly predicted ATUs by SeqATU based on perfect matching tended to  
239 have strong similarities with the ATUs in the evaluation data. In addition, we also found that more than a  
240 quarter of the incorrectly predicted ATUs (25%/29% for M9Enrich\_Seq/RiEnrich\_Seq) by SeqATU

241 based on perfect matching matched with the transcription units in RegulonDB (19).

242 The two evaluation datasets (SMRT\_M9Enrich and SMRT\_RiEnrich) were both from SMRT-  
243 Cappable-seq, while one of the processing steps of the technique filtered RNA reads smaller than 1,000  
244 bp (6), which indicated that the ATUs in these two evaluation datasets were not comprehensive. To  
245 address this issue, we enriched the evaluation data by adding the ATUs defined by SEnd-seq (7), as  
246 SEnd-seq did not introduce any filtering based on RNA size. When we used the new evaluation data, the  
247 ATUs predicted by SeqATU improved by 15% (0.77) and 19% (0.76) in terms of the average precision  
248 based on perfect matching for M9Enrich\_Seq and RiEnrich\_Seq, respectively, and by 9% (0.84) and  
249 12% (0.83) based on relaxed matching. The statistics for precision across different sizes of the maximal  
250 ATU clusters are shown in Fig. 3B and fig. S4B, showing that the values of precision based on perfect  
251 matching were significantly improved across different sizes of maximal ATU clusters by using the  
252 evaluated ATUs from SMRT-Cappable-seq and SEnd-seq. This result suggested that the ATUs we  
253 predicted, which were not in SMRT\_M9Enrich and SMRT\_RiEnrich, may be due to the RNA length  
254 selection of SMRT-Cappable-seq. We enriched the evaluation data by adding the ATUs in RegulonDB  
255 (19) and also found the improvement of precision across different sizes of maximal ATU clusters for  
256 M9Enrich\_Seq and RiEnrich\_Seq (fig. S4C).

257 Furthermore, to facilitate the understanding of the performance of SeqATU and to measure the  
258 influence of the maximal ATU clusters from rSeqTU on our ATU prediction method, SMRT maximal  
259 ATU clusters collected from SMRT\_M9Enrich and SMRT\_RiEnrich (for more details, see method S8)

260 were applied for the CQP in two conditions (M9 minimal medium and Rich medium). We found that  
261 precision and recall increased to 0.73 and 0.77 for M9Enrich\_Seq, respectively, and 0.69 and 0.80 for  
262 RiEnrich\_Seq based on perfect matching (fig. S4D). Additionally, when using relaxed matching,  
263 precision and recall significantly increased to 0.82 and 0.84 for M9Enrich\_Seq, respectively, and 0.79  
264 and 0.86 for RiEnrich\_Seq (fig. S4D). The significantly improved results verified the ability of SeqATU  
265 to accurately predict ATU when giving more accurate maximal ATU clusters. In addition, we found that  
266 the number of predicted ATUs and the evaluated ATUs under the maximal ATU cluster with the same  
267 size were similar except for the maximal size (Fig. 3C), and they were far less than the theoretical  
268 number, which indicated that SeqATU can effectively exclude most of the incorrect ATUs.

269 Please place Fig. 3 here.

### 270 **The bias rate constraints efficiently improve the ability of SeqATU to predict ATUs**

271 We tried to use SeqATU without bias rate constraints to predict the ATUs of *E. coli* and found that its  
272 performance significantly decreased compared with SeqATU (Fig. 4 and fig. S5). Specifically, the F-  
273 score of SeqATU without bias rate constraints was 0.69/0.68 based on perfect matching for  
274 M9Enrich\_Seq/RiEnrich\_Seq, compared with 0.75/0.74 for SeqATU. When using relaxed matching, the  
275 F-score of SeqATU without bias rate constraints was 0.79/0.78 for M9Enrich\_Seq/RiEnrich\_Seq,  
276 compared with 0.83/0.83 for SeqATU. This result suggested that the bias rate constraints of SeqATU  
277 could capture useful information about the non-uniform distribution of the RNA-Seq reads along the



278 mRNA transcripts (32-35) and then efficiently improve the ability of the model to predict complex  
279 ATUs.

280 Please place Fig. 4 here.

### 281 **ATUs predicted by SeqATU display a dynamic composition and overlapping nature**

282 A total of 2,973 distinct ATUs were identified in M9 minimal medium, and 2,767 were identified in Rich  
283 medium. Among them, there were 1,423/1,550 distinct ATUs on the forward strand and 1,323/1,444 on  
284 the reverse strand for M9Enrich\_Seq/RiEnrich\_Seq. Each of the predicted ATUs was comprised of an  
285 average of 2.59 genes, with the largest ATU containing 28 genes across the two conditions. The  
286 distribution of the size of the predicted ATUs is shown in Fig. 5A, from which we can see that the  
287 majority of ATUs (more than 87%) contained fewer than five genes in M9 minimal medium and Rich  
288 medium. Approximately 41% of the genes in *E. coli* were contained in more than one ATU for  
289 M9Enrich\_Seq, compared to 43% genes for RiEnrich\_Seq, suggesting that the ATUs in a maximal ATU  
290 cluster generally overlapped with each other (Fig. 5B). In addition, there were 1,576 ATU maximal  
291 clusters for M9Enrich\_Seq and 1,512 ATU maximal clusters for RiEnrich\_Seq. SeqATU identified a  
292 total of 1,977 identical ATUs under the two conditions, whereas there were 1,786 distinct ATUs. Among  
293 the distinct ATUs across the two conditions, 394 ATUs were from the same maximal ATU clusters in the  
294 two maximal ATU cluster datasets, and the rest were from different maximal ATU clusters. The fact  
295 there were distinct ATUs under the two conditions suggests that ATUs are dynamically responsive to

296 different conditions or environmental stimuli (for more real examples about the ATUs under different  
297 conditions, see fig. S6).

298 The dynamic composition of predicted ATUs by SeqATU is of great significance to understand the  
299 interactions inside polymicrobial communities. For example, chronic airway infection by *Pseudomonas*  
300 *aeruginosa* considerably contributes to lung tissue destruction and impairment of pulmonary function in  
301 cystic-fibrosis (CF) patients (39). Marie *et al.* found that the presence of *E. coli* complemented the  
302 growth defect of a *P. aeruginosa bioA*-disrupted mutant that is unable to grow on rich medium, and can  
303 be beneficial to *P. aeruginosa* when biotin supply is limited (39). An ATU with a high expression level  
304 coded by the *uvrB* gene is identified by SeqATU in Rich medium, while it does not exist in M9 minimal  
305 medium (Fig. 6). We predicted the *uvrB* gene to be involved in the biotin metabolism pathway, as the  
306 *bioB*, *bioF*, *bioC*, and *bioD* genes contained in a same ATU with it have been known in the biotin  
307 metabolism KEGG pathway. Therefore, the observation by Marie *et al.* can be explained that the ATUs  
308 coded by the *uvrB* gene of *E. coli* can provide the biotin supply for *P. aeruginosa* under rich medium.  
309 This result showed that SeqATU could increase our understanding of interspecies competition and  
310 cooperation, which play an important role in shaping the composition and structure of polymicrobial  
311 bacterial populations.

312 Please place Fig. 5 here.

313 Please place Fig. 6 here.

### 314 **Predicted ATUs by SeqATU are verified by experimental TSSs and TTSs**

315 An experimental TSS dataset of *E. coli* from SEnd-seq (7) and a TF binding site dataset of *E. coli* from  
316 the experimental dataset of RegulonDB (19) were used to further verify the reliability of SeqATU and  
317 were named dataset 1 and dataset 2, respectively. There were 5,512 experimental TSSs in dataset 1 and  
318 3,220 experimental TF binding sites in dataset 2. We considered the 5'-end genes and no 5'-end genes of  
319 the predicted ATUs by SeqATU. A gene that is not the 5'-end gene of any predicted ATU is named a no  
320 5'-end gene. We identified 2,177/2,005 5'-end genes and 1,266/1,160 no 5'-end genes of the predicted  
321 ATUs for M9Enrich\_Seq/RiEnrich. A gene validated by experimental TSSs or TF binding sites means  
322 that it is the immediate downstream gene of an experimental TSS or TF binding site. As a result, the  
323 proportion of 5'-end genes of the predicted ATUs that were validated by experimental TSSs or TF  
324 binding sites was over 1.7 times greater than that of the no 5'-end genes (Table 1). Specifically, the  
325 proportion of 5'-end genes (29%/30% for M9Enrich\_Seq/RiEnrich\_Seq) validated by experimental TF  
326 binding sites was over three times greater than the no 5'-end genes (9.2%/9.0% for  
327 M9Enrich\_Seq/RiEnrich\_Seq). These results further verified the reliability of the ATUs predicted by  
328 SeqATU in terms of the TSS level. In addition, four other experimental TSS or promoter datasets from  
329 RegulonDB (19), dRNA-seq (14), and Cappable-seq (13) were also examined. The results are shown in  
330 table S3, and we also found a higher proportion of 5'-end genes of the predicted ATUs validated by  
331 experimental TSSs or promoters than that of no 5'-end genes.

332 We also used two experimental TTS datasets of *E. coli* from SEnd-seq (7) and RegulonDB (19) to

333 verify the reliability of predicted ATUs by SeqATU in terms of TTS level. These two experimental TTS  
334 datasets were named dataset 3 and dataset 4, respectively. There were 1,540 experimental TTSs in  
335 dataset 3 and 367 experimental TTSs in dataset 4. We considered the 3'-end genes and no 3'-end genes  
336 of the predicted ATUs by SeqATU. A gene that is not the 3'-end gene of any predicted ATU is named a  
337 no 3'-end gene. We identified 2,290/2,187 3'-end genes and 1,153/978 no 3'-end genes of the predicted  
338 ATUs for M9Enrich\_Seq/RiEnrich\_Seq. A gene validated by experimental TTSs means that it is the  
339 immediate upstream gene of an experimental TTS. As a result, the proportion of 3'-end genes of the  
340 predicted ATUs that were validated by experimental TTSs was over two times greater than that of no 3'-  
341 end genes (Table 2). Specifically, the proportion of 3'-end genes (51%/53% for  
342 M9Enrich\_Seq/RiEnrich\_Seq) validated by experimental TTSs from SEnd-seq was over three times  
343 greater than that of no 3'-end genes (15%/14% for M9Enrich\_Seq/RiEnrich\_Seq). These results further  
344 verified the reliability of the ATUs predicted by SeqATU in terms of the TTS level. In addition, two  
345 other computationally predicted TTS datasets from the works by Nadiras *et al.* (40) and Kingsford *et al.*  
346 (41) were also examined. The results are shown in table S4, and we also found the proportion of 3'-end  
347 genes (63%/62% for M9Enrich\_Seq/RiEnrich\_Seq) validated by computationally predicted Rho-  
348 independent TTSs was over two times greater than that of no 3'-end genes (29%/29% for  
349 M9Enrich\_Seq/RiEnrich\_Seq).

350 Please place Table 1 here.

351 Please place Table 2 here.

352 **The gene pairs frequently encoded in the same ATUs are more functionally related than those that**  
353 **can belong to two distinct ATUs**

354 Functional analysis was conducted by integrating GO terms from the Gene Ontology (GO) database  
355 (42). In detail, we measured the level of functional relatedness for two types of consecutive gene pairs,  
356 which is similar to the definition in the work by Mao *et al.* (38). Two types of consecutive gene pairs  
357 were (i) gene pairs each consisting of a 5'-end gene of an ATU and the gene in its immediate upstream  
358 on the same strand and (ii) all the other gene pairs inside an ATU (Fig. 7A). In addition, we used a  
359 scoring scheme to measure the GO-based functional similarity between a pair of genes by Wu *et al.* (43).  
360 This study developed a GO similarity score and showed that the larger the score, the more likely that  
361 two genes are functionally related. In brief, the GO similarity score of a gene pair  $g_k$  and  $g_j$  is  
362 denoted as  $S_{GO}(g_k, g_j)$ :

$$363 \quad S_{GO}(g_k, g_j) = \max_{V_k \in V(g_k), V_j \in V(g_j)} s(V_k, V_j)$$

364 where  $V_k$  and  $V_j$  are the GO terms assigned to  $g_k$  and  $g_j$ , respectively;  $s(V_k, V_j)$  is the maximal  
365 number of common terms between paths in the two GO graphs induced by the GO terms  $V_k$  and  $V_j$ .

366 As a result, the mean GO similarity score was higher for type-ii gene pairs (5.97 versus 4.04 for  
367 M9Enrich\_Seq and 5.86 versus 3.91 for RiEnrich\_Seq) than for type-i gene pairs. A total of 574/524  
368 type-ii gene pairs had GO similarity scores greater than four (64%/63% of a total of 899/834), while  
369 only 461/404 type-i gene pairs had GO similarity scores greater than four (36%/34% of a total of  
370 1,274/1,179) for M9Enrich\_Seq/RiEnrich\_Seq. We also applied a  $\chi^2$ -test (44) to determine whether the

371 distribution of  $S_{GO}(g_k, g_j)$  was different for the type-*i* gene pairs and type-*ii* gene pairs. The  $\chi^2$ -  
372 statistics corresponded to a *P*-value less than  $10^{-4}$ , which revealed that the distribution of  $S_{GO}(g_k, g_j)$   
373 for the type-*ii* gene pairs was significantly different from the type-*i* gene pairs. Fig. 7B shows the  
374 distribution of  $S_{GO}(g_k, g_j)$  for the type-*i* gene pairs and the type-*ii* gene pairs. These results strongly  
375 indicated that the type-*ii* gene pairs had a higher degree of GO similarity than the type-*i* gene pairs,  
376 suggesting that the gene pairs frequently encoded in the same ATUs (type-*ii* gene pairs) are more  
377 functionally related than those that can belong to two distinct ATUs (type-*i* gene pairs).

378 We also carried out a similar analysis of the two different gene pairs based on KEGG enrichment  
379 analysis (see more details in method S9) and found that the proportion of type-*ii* gene pairs (59%/57%  
380 for M9Enrich\_Seq/RiEnrich\_Seq), whose two genes were contained in the same KEGG pathway, was  
381 higher than the proportion of type-*i* gene pairs (32%/28% for M9Enrich\_Seq/RiEnrich\_Seq) (Fig. 7C).  
382 The distribution of the KEGG similarity scores of the two different types of gene pairs is shown in Fig.  
383 7D, suggesting that genes of type-*ii* gene pairs have a higher probability of participating in the same  
384 KEGG pathway than those of type-*i* gene pairs.

385 Please place Fig. 7 here.

## 386 **DISCUSSION**

387 We developed SeqATU, the first computational method for genome-scale ATU prediction by analyzing  
388 next- and third-generation RNA-Seq data, using a CQP model. Linear constraints provided by the bias

389 rate of read distribution were, for the first time, integrated into the CQP model. Positional bias refers to  
390 the non-uniform distribution of reads over different positions of a transcript (33, 35), which is handled  
391 by learning non-uniform read distributions from given RNA-Seq reads (32) or modeling the RNA  
392 degradation (45). The bias rate function we proposed can address the non-uniform read distribution  
393 along mRNA transcripts and also be desirable for standard next-generation RNA-Seq data that involves  
394 more degraded mRNAs, as the exponential function has been used to model the degradation of mRNA  
395 transcripts (45). As a result, a total of 2,973 distinct ATUs for M9Enrich\_Seq and 2,767 distinct ATUs  
396 for RiEnrich\_Seq were identified by SeqATU. The precision and recall reached 0.67/0.64 and 0.67/0.68,  
397 respectively, based on perfect matching and 0.77/0.74 and 0.75/0.76, respectively, based on relaxed  
398 matching for M9Enrich\_Seq/RiEnrich\_Seq. We further validated predicted ATUs using experimental  
399 transcription factor binding sites or transcription termination sites from RegulonDB and SEnd-Seq. In  
400 addition, the proportion of the 5'- or 3'-end genes of predicted ATUs that were validated by  
401 experimental transcription factor binding sites and transcription termination sites was over three times  
402 greater than that of no 5'- or 3'-end genes, demonstrating the high reliability of predicted ATUs. Gene  
403 pairs frequently encoded in the same ATUs were more functionally related than those that can belong to  
404 two distinct ATUs according to GO and KEGG enrichment analyses. These results demonstrated the  
405 reliability and accuracy of our predicted ATUs, implying the ability of SeqATU to reveal the  
406 transcriptional architecture of the bacterial genome.

407 In fact, the ATU architecture of bacteria is much more complex than that determined with currently

408 used experimental techniques. We investigated the 5'-end genes and no 5'-end genes of the experimental  
409 ATUs identified by SMRT-Cappable-seq (6) using a combination of experimental TSSs from  
410 RegulonDB (19), dRNA-seq (14), Cappable-seq (13), and SEnd-seq (7). As a result, we found that the  
411 proportion of 5'-end genes (99%) validated by experimental TSSs was not significantly different from  
412 that of no 5'-end genes (92%). The high percentage of no 5'-end genes validated by experimental TSSs  
413 implied that the ATUs identified by experimental techniques are only a small proportion of the  
414 comprehensive ATUs in bacterial organisms due to the dynamic mechanisms of ATUs. These results  
415 further verified the necessity of developing robust computational methods for ATU identification.

416 SeqATU not only provides a powerful tool to understand the transcription mechanism of bacteria but  
417 also provides a fundamental tool to guide the reconstruction of a genome-scale transcriptional regulatory  
418 network. First, the ATU structure can help us to make new functional predictions, as genes in an ATU  
419 tend to have related functions. Second, ATUs can elucidate condition-specific uses of alternative sigma  
420 factors (8, 46). For example, the *thrLABC* operon is regulated by transcriptional attenuation. Totsuka *et*  
421 *al.* found that under the log phase growth condition, the *thrLABC* operon is the only transcript, while  
422 two transcripts are found under stationary phase growth condition, the *thrLABC* and *thrBC*. As validated  
423 experimentally,  $\sigma^S$  can regulate the additional promoter located in front of *thrB* under the stationary  
424 phase growth condition and then separately regulate *thrBC*, which elucidates the condition-specific uses  
425 of  $\sigma^S$  (8). Third, understanding the ATU structure is of great help to construct transcriptional and  
426 translation regulatory networks, such as for the construction of the  $\sigma$ -TUG ( $\sigma$ -factor-transcription unit



427 gene) network (47). The transcription regulatory network consists of nodes (ATU and regulatory  
428 proteins) and links (interactions) (48), and the comprehensive ATU structure can provide a nearly  
429 complete set of nodes, which can improve the accuracy of regulatory prediction.

430 Although SeqATU has obtained satisfactory predicted results, there are still several challenges  
431 regarding the computational prediction of ATUs. On the one hand, due to the influence of the 3'  
432 untranslated region (UTR) and 5' untranslated region (UTR) in the intergenic regions, the expression  
433 value of intergenic regions cannot be reproduced perfectly by the same calculation used for the  
434 expression value of genetic regions. Without accurate reproduction, it is difficult to obtain the best  
435 expression combination of ATUs by the programming model based on the expression value of genetic  
436 and intergenic regions. On the other hand, due to the lack of strand-specific RNA-Seq data, it is difficult  
437 to distinguish the expression level of intergenic regions between two consecutive genes on the same  
438 strand derived from ATUs containing these two genes or antisense RNAs (asRNAs) (6, 49). All of these  
439 challenges and the great significance of ATU prediction inspire and encourage us to discover more  
440 information to determine the ATU structure in bacteria. For example, we plan to add high confidence  
441 TSSs and TTSs information to our programming model in the future. Additionally, since the microbiome  
442 is increasingly recognized as a critical component in human diseases, such as inflammatory bowel  
443 disease (50), antibiotic-associated diarrhoea (51), neurological disorders (52), and cancer (53) (54),  
444 predicting new ATUs of uncultured species from metagenomic and metatranscriptomic data is of great  
445 significance in uncovering new regulatory pathway and metabolic products during the development of

446 diseases (55). However, due to a majority of species with unknown genomes or genome annotations  
447 within a microbial community, ATU prediction on metagenomics and metatranscriptomics is still a  
448 challenging task, which encourage us to pay more attention on it.

## 449 REFERENCES

- 450 1. F. Jacob, D. Perrin, C. Sanchez, J. Monod, Operon: a group of genes with the expression  
451 coordinated by an operator. *C R Hebd. Seances. Acad. Sci* **250**, 1727-1729 (1960).
- 452 2. F. Jacob, J. Monod, Genetic regulatory mechanisms in the synthesis of proteins. *J. Mol. Biol.* **3**,  
453 318-356 (1961).
- 454 3. Z. Liu, J. Feng, B. Yu, Q. Ma, B. Liu, The functional determinants in the organization of bacterial  
455 genomes. *Brief. Bioinform.*, doi.org/10.1093/bib/bbaa1172 (2020).
- 456 4. W.-C. Chou, Q. Ma, S. Yang, S. Cao, D. M. Klingeman, S. D. Brown, Y. Xu, Analysis of strand-  
457 specific RNA-seq data using machine learning reveals the structures of transcription units in  
458 *Clostridium thermocellum*. *Nucleic Acids Res.* **43**, e67-e67 (2015).
- 459 5. S.-Y. Niu, B. Liu, Q. Ma, W.-C. Chou, rSeqTU—a machine-learning based R package for  
460 prediction of bacterial transcription units. *Frontiers in genetics* **10**, 374 (2019).
- 461 6. B. Yan, M. Boitano, T. A. Clark, L. Ettwiller, SMRT-Cappable-seq reveals complex operon  
462 variants in bacteria. *Nat. Commun.* **9**, 3676 (2018).

- 463 7. X. Ju, D. Li, S. Liu, Full-length RNA profiling reveals pervasive bidirectional transcription  
464 terminators in bacteria. *Nature microbiology* **4**, 1907-1918 (2019).
- 465 8. K. Totsuka, K. Totsuka, The Transcription Unit Architecture of the Escherichia Coli Genome. *Nat.*  
466 *Biotechnol.* **27**, 1043-1049 (2009).
- 467 9. A. H. Bhat, D. Pathak, A. Rao, The *alr-groEL1* operon in *Mycobacterium tuberculosis*: an interplay  
468 of multiple regulatory elements. *Scientific Reports* **7**, 43772 (2017).
- 469 10. C. M. Sharma, S. Hoffmann, F. Darfeuille, J. Reignier, S. Findeiß, A. Sittka, S. Chabas, K. Reiche,  
470 J. Hackermüller, R. Reinhardt, The primary transcriptome of the major human pathogen  
471 *Helicobacter pylori*. *Nature* **464**, 250-255 (2010).
- 472 11. J. M. Durand, G. R. Bjork, Putrescine or a combination of methionine and arginine restores  
473 virulence gene expression in a tRNA modification-deficient mutant of *Shigella flexneri*: a possible  
474 role in adaptation of virulence. *Mol. Microbiol.* **47**, 519-527 (2010).
- 475 12. L. E. Wroblewski, R. M. Peek, K. T. Wilson, *Helicobacter pylori* and gastric cancer: factors that  
476 modulate disease risk. *Clin. Microbiol. Rev.* **23**, 713-739 (2010).
- 477 13. L. Ettwiller, J. Buswell, E. Yigit, I. Schildkraut, A novel enrichment strategy reveals unprecedented  
478 number of novel transcription start sites at single base resolution in a model prokaryote and the  
479 gut microbiome. *BMC Genomics* **17**, 199-199 (2016).

- 480 14. M. K. Thomason, T. Bischler, S. K. Eisenbart, K. U. Forstner, A. Zhang, A. Herbig, K. Nieselt, C.  
481 M. Sharma, G. Storz, Global transcriptional start site mapping using differential RNA sequencing  
482 reveals novel antisense RNAs in Escherichia coli. *J. Bacteriol.* **197**, 18-28 (2015).
- 483 15. T. Bischler, H. S. Tan, K. Nieselt, C. M. Sharma, Differential RNA-seq (dRNA-seq) for annotation  
484 of transcriptional start sites and small RNAs in Helicobacter pylori. *Methods* **86**, 89-101 (2015).
- 485 16. D. Dar, M. Shamir, J. Mellin, M. Koutero, N. Stern-Ginossar, P. Cossart, R. Sorek, Term-seq  
486 reveals abundant ribo-regulation of antibiotics resistance in bacteria. *Science* **352**, 6282 (2016).
- 487 17. J. Clauwaert, G. Menschaert, W. Waegeman, An in-depth evaluation of annotated transcription  
488 start sites in E. coli using deep learning. *bioRxiv*, doi: <https://doi.org/10.1101/2020.03.16.993501>,  
489 4 November 2020, pre-print: not peer-reviewed. (2020).
- 490 18. S. Goodwin, J. D. Mcpherson, W. R. McCombie, Coming of age: ten years of next-generation  
491 sequencing technologies. *Nat. Rev. Genet.* **17**, 333-351 (2016).
- 492 19. A. Santos-Zavaleta, H. Salgado, S. Gama-Castro, M. Sánchez-Pérez, L. Gómez-Romero, D.  
493 Ledezma-Tejeida, J. S. García-Sotelo, K. Alquicira-Hernández, L. J. Muñoz-Rascado, P. Peña-  
494 Loreda, RegulonDB v 10.5: tackling challenges to unify classic and high throughput knowledge  
495 of gene regulation in E. coli K-12. *Nucleic Acids Res.* **47**, D212-D220 (2018).
- 496 20. N. Sierro, Y. Makita, M. J. L. De Hoon, K. Nakai, DBTBS: a database of transcriptional regulation  
497 in Bacillus subtilis containing upstream intergenic conservation information. *Nucleic Acids Res.*

- 498           **36**, 93-96 (2008).
- 499   21.   P. S. Dehal, M. P. Joachimiak, M. N. Price, J. T. Bates, J. K. Baumohl, C. Dylan, G. D. Friedland,  
500       K. H. Huang, K. Keith, P. S. Novichkov, MicrobesOnline: an integrated portal for comparative and  
501       functional genomics. *Nucleic Acids Res.* **38**, D396-D400 (2010).
- 502   22.   H. Cao, Q. Ma, X. Chen, Y. Xu, DOOR: a prokaryotic operon database for genome analyses and  
503       functional inference. *Brief. Bioinform.* **20**, 1568-1577 (2019).
- 504   23.   X. Mao, Q. Ma, C. Zhou, X. Chen, H. Zhang, J. Yang, F. Mao, W. Lai, Y. Xu, DOOR 2.0: presenting  
505       operons and their functions through dynamic and integrated views. *Nucleic Acids Res.* **42**, D654-  
506       D659 (2013).
- 507   24.   K. Chetal, S. C. Janga, OperomeDB: A Database of Condition-Specific Transcription Units in  
508       Prokaryotic Genomes. *Biomed Research International* **2015**, 1-10 (2015).
- 509   25.   J. Yang, X. Chen, A. Mcdermaid, Q. Ma, DMINDA 2.0: integrated and systematic views of  
510       regulatory DNA motif identification and analyses. *Bioinformatics* **33**, 2586-2588 (2017).
- 511   26.   T. Blanca, C. Ricardo, C. E. Martinez-Guerrero, M. Enrique, ProOpDB: Prokaryotic Operon  
512       DataBase. *Nucleic Acids Res.* **40**, D627-D631 (2012).
- 513   27.   R. McClure, D. Balasubramanian, Y. Sun, M. Bobrovskyy, P. Sumby, C. A. Genco, C. K.  
514       Vanderpool, B. Tjaden, Computational analysis of bacterial RNA-Seq data. *Nucleic Acids Res.* **41**,

- 515 e140-e140 (2013).
- 516 28. X. Chen, W. Chou, Q. Ma, Y. Xu, SeqTU: A Web Server for Identification of Bacterial  
517 Transcription Units. *Scientific Reports* **7**, 43925 (2017).
- 518 29. I. A. Garanina, G. Y. Fisunov, V. M. Govorun, BAC-BROWSER: The Tool for Visualization and  
519 Analysis of Prokaryotic Genomes. *Frontiers in Microbiology* **9**, 2827 (2018).
- 520 30. B. Taboada, K. Estrada, R. Ciria, E. Merino, Operon-mapper: a web server for precise operon  
521 identification in bacterial and archaeal genomes. *Bioinformatics* **34**, 4118-4120 (2018).
- 522 31. H. Li, R. Durbin, Fast and accurate short read alignment with Burrows–Wheeler transform.  
523 *Bioinformatics* **25**, 1754-1760 (2009).
- 524 32. Z. Wu, X. Wang, X. Zhang, Using non-uniform read distribution models to improve isoform  
525 expression inference in RNA-Seq. *Bioinformatics* **27**, 502-508 (2011).
- 526 33. A. Roberts, C. Trapnell, J. Donaghey, J. L. Rinn, L. Pachter, Improving RNA-Seq expression  
527 estimates by correcting for fragment bias. *Genome Biol.* **12**, 1-14 (2011).
- 528 34. R. Bohnert, G. R̈ıj ½tsch, rQuant. web: a tool for RNA-Seq-based transcript quantitation. *Nucleic  
529 Acids Res.* **38**, W348-W351 (2010).
- 530 35. W. Li, T. Jiang, Transcriptome assembly and isoform expression level estimation from biased  
531 RNA-Seq reads. *Bioinformatics* **28**, 2914-2921 (2012).

- 532 36. B. Xiong, Y. Yang, F. R. Fineis, J.-P. Wang, DegNorm: normalization of generalized transcript  
533 degradation improves accuracy in RNA-seq analysis. *Genome Biol.* **20**, 75 (2019).
- 534 37. J. Chaitanya, Degradation of mRNA in Escherichia coli. *IUBMB Life* **54**, 315-321 (2010).
- 535 38. X. Mao, Q. Ma, B. Liu, X. Chen, H. Zhang, Y. Xu, Revisiting operons: an analysis of the landscape  
536 of transcriptional units in E. coli. *BMC Bioinformatics* **16**, 356 (2015).
- 537 39. B. Marie, K. H. Thilo, F. Thierry, T. Mikael, R. Adriana, V. D. Christian, Metabolic pathways of  
538 *Pseudomonas aeruginosa* involved in competition with respiratory bacterial pathogens. *Frontiers*  
539 *in Microbiology* **6**, 321 (2015).
- 540 40. C. Nadiras, E. Eveno, A. Schwartz, N. Figueroa-Bossi, M. Boudvillain, A multivariate prediction  
541 model for Rho-dependent termination of transcription. *Nucleic Acids Res.* **46**, 8245-8260 (2018).
- 542 41. C. L. Kingsford, K. Ayanbule, S. L. Salzberg, Rapid, accurate, computational discovery of Rho-  
543 independent transcription terminators illuminates their relationship to DNA uptake. *Genome Biol.*  
544 **8**, R22 (2007).
- 545 42. M. Ashburner, S. Lewis, On Ontologies for Biologists: The Gene Ontology—Untangling the Web.  
546 *Novartis Found. Symp.* **247**, 66-80; discussion 80-63, 84-90, 244-252 (2002).
- 547 43. H. Wu, Z. Su, F. Mao, V. Olman, Y. Xu, Prediction of functional modules based on comparative  
548 genome analysis and Gene Ontology application. *Nucleic Acids Res.* **33**, 2822-2837 (2005).

- 549 44. S. A. Teukolsky, B. P. Flannery, W. Press, W. Vetterling, Numerical Recipes in C: The Art of  
550 Scientific Computing. *Cambridge University Press*, Cambridge (1992).
- 551 45. L. Wan, X. Yan, T. Chen, F. Sun, Modeling RNA degradation for RNA-Seq with applications.  
552 *Biostatistics* **13**, 734-747 (2012).
- 553 46. C. Yanofsky, Attenuation in the control of expression of bacterial operons. *Nature* **289**, 751 (1981).
- 554 47. B. K. Cho, D. Kim, E. M. Knight, K. Zengler, B. O. Palsson, Genome-scale reconstruction of the  
555 sigma factor network in *Escherichia coli* : topology and functional states. *BMC Biol.* **12**, 4-4 (2014).
- 556 48. B.-K. Cho, P. Charusanti, M. J. Herrgård, Microbial regulatory and metabolic networks. *Curr. Opin.*  
557 *Biotechnol.* **18**, 360-364 (2007).
- 558 49. A. Toledo-Arana, O. Dussurget, G. Nikitas, N. Sesto, H. Guet-Revillet, D. Balestrino, E. Loh, J.  
559 Gripenland, T. Tiensuu, K. Vaitkevicius, The *Listeria* transcriptional landscape from saprophytism  
560 to virulence. *Nature* **459**, 950-956 (2009).
- 561 50. B. Yue, X. Luo, Z. Yu, S. Mani, Z. Wang, W. Dou, Inflammatory bowel disease: a potential result  
562 from the collusion between gut microbiota and mucosal immune system. *Microorganisms* **7**, 440  
563 (2019).
- 564 51. B. H. Mullish, H. R. Williams, *Clostridium difficile* infection and antibiotic-associated diarrhoea.  
565 *Clin. Med.* **18**, 237 (2018).



- 566 52. M. Maguire, G. Maguire, Gut dysbiosis, leaky gut, and intestinal epithelial proliferation in  
567 neurological disorders: towards the development of a new therapeutic using amino acids,  
568 prebiotics, probiotics, and postbiotics. *Rev. Neurosci.* **30**, 179-201 (2019).
- 569 53. S. Vivarelli, R. Salemi, S. Candido, L. Falzone, M. Santagati, S. Stefani, F. Torino, G. L. Banna,  
570 G. Tonini, M. Libra, Gut microbiota and cancer: from pathogenesis to therapy. *Cancers* **11**, 38  
571 (2019).
- 572 54. G. Cammarota, G. Ianiro, A. Ahern, C. Carbone, A. Temko, M. J. Claesson, A. Gasbarrini, G.  
573 Tortora, Gut microbiome, big data and machine learning to promote precision medicine for cancer.  
574 *Nature Reviews Gastroenterology & Hepatology* **17**, 635-648 (2020).
- 575 55. S. S. A. Zaidi, X. Zhang, Computational operon prediction in whole-genomes and metagenomes.  
576 *Briefings in functional genomics* **16**, 181-193 (2017).

## 577 **ACKNOWLEDGEMENTS**

578 **Funding:** This work was supported by the National Nature Science Foundation of China (NSFC)  
579 [61772313 to B.L., 11931008 to B.L.]; Interdisciplinary Science Innovation Group Project of Shandong  
580 University (2019); and the Innovation Method Fund of China [2018IM020200 to B.L.]. The authors  
581 would like to thank Yang Li for his assistance in language polishing. **Authors' contributions:** B.L.,  
582 Q.M. and W.C. conceived the basic idea and designed the overall analyses. Q.W. carried out most of the  
583 computational analysis and data interpretation. All the authors wrote the manuscript. **Competing**

584 **interests:** The authors declare that they have no competing interests. **Data and materials availability:**

585 The raw data and source code of SeqATU and a detailed tutorial can be found at

586 <https://github.com/OSU-BMBL/SeqATU>.

## 587 FIGURES AND TABLES

588 **Table 1. Results of predicted ATUs verified by experimental TSSs or TF binding sites.** Overview of  
 589 the experimental TSS and TF binding site datasets (dataset 1 and dataset 2) and the proportion of 5'-end  
 590 genes and no 5'-end genes of the predicted ATUs by SeqATU for M9Enrich\_Seq and RiEnrich\_Seq, which  
 591 were validated by experimental TSSs or TF binding sites.

|                       |                 | dataset 1            | dataset 2                  |
|-----------------------|-----------------|----------------------|----------------------------|
| Source                |                 | Ju <i>et al.</i> (7) | RegulonDB TF binding sites |
| Technique             |                 | SEnd-seq             | Collection                 |
| TSSs/TF binding sites |                 | 5,512                | 3,220                      |
| M9Enrich_Se<br>q      | 5'-end genes    | 83%                  | 29%                        |
|                       | no 5'-end genes | 47%                  | 9.2%                       |
| RiEnrich_Seq          | 5'-end genes    | 89%                  | 30%                        |
|                       | no 5'-end genes | 44%                  | 9.0%                       |

592

593

594 **Table 2. Results of predicted ATUs verified by experimental TTSs.** Overview of the experimental  
 595 TTS datasets (dataset 3 and dataset 4) and the proportion of 3'-end genes and no 3'-end genes of the  
 596 predicted ATUs by SeqATU for M9Enrich\_Seq and RiEnrich\_Seq, which were validated by  
 597 experimental TTSs.

|                  |                 | dataset 3            | dataset 4      |
|------------------|-----------------|----------------------|----------------|
|                  | Source          | Ju <i>et al.</i> (7) | RegulonDB TTSs |
|                  | Technique       | SEnd-seq             | Collection     |
|                  | TTSs            | 1,540                | 3,67           |
| M9Enrich_Se<br>q | 3'-end genes    | 51%                  | 11%            |
|                  | no 3'-end genes | 15%                  | 5.2%           |
| RiEnrich_Seq     | 3'-end genes    | 53%                  | 11%            |
|                  | no 3'-end genes | 14%                  | 4.8%           |

598

599

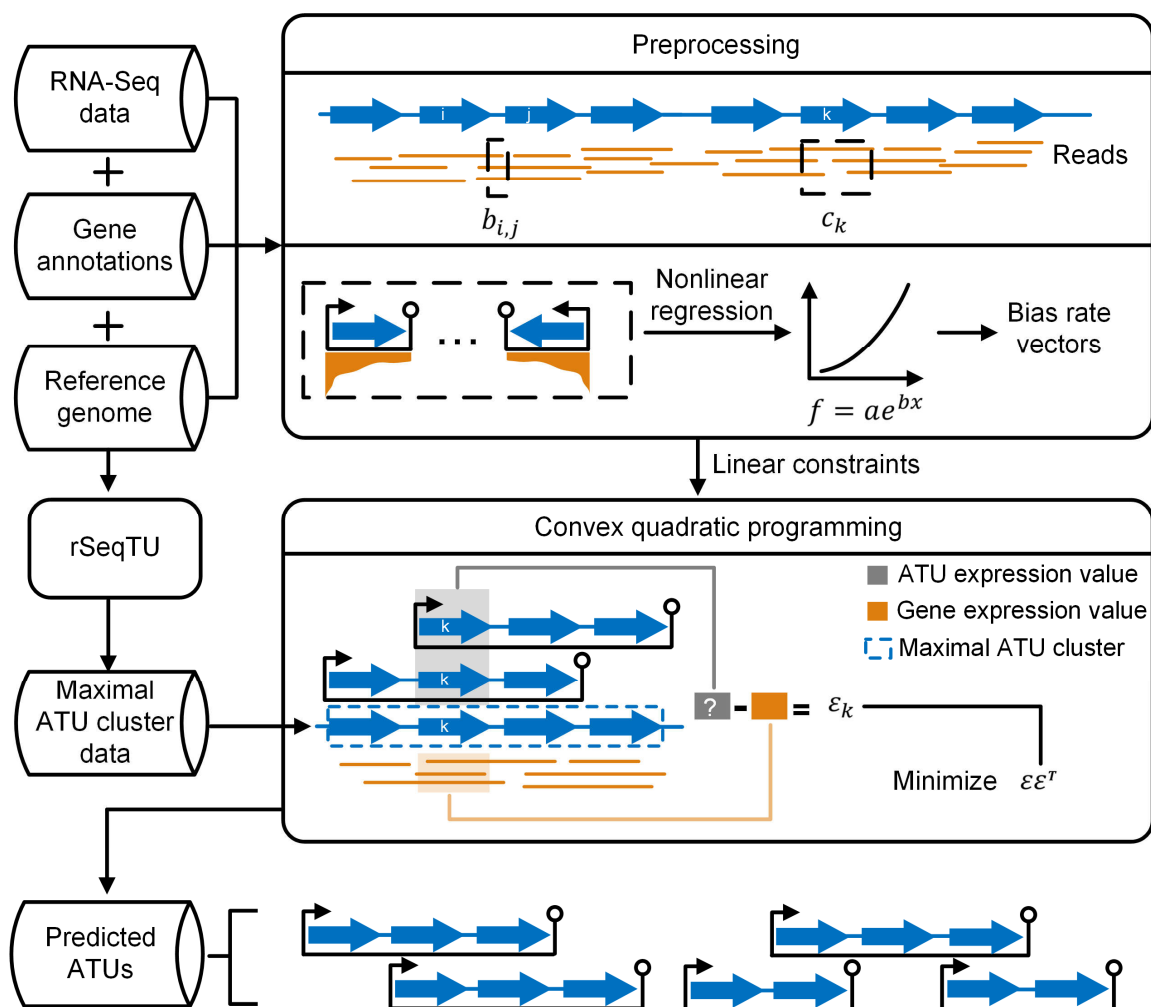

600

601 **Fig. 1. Schematic overview of SeqATU.** The blue arrow and orange line denote gene and RNA-Seq

602 read, respectively. The preprocessing stage requires RNA-Seq data in the FASTQ format, the reference

603 genome sequence in the FASTA format, and gene annotations in the GFF format, generating linear  
604 constraints for the next convex quadratic programming (CQP) stage. There are two steps in the  
605 preprocessing stage: (i) calculating the expression value of the genetic region  $c_k$  and intergenic region  
606  $b_{i,j}$  and (ii) modelling non-uniform read distribution along mRNA transcripts; specifically, we acquired  
607 a bias rate function  $f(x) = ae^x$  using nonlinear regression and then constructed genetic or intergenic  
608 region bias rate vectors. The maximal ATU cluster data determined by rSeqTU and the linear constraints  
609 from preprocessing are both taken as inputs of CQP. CQP seeks the optimum expression combination of  
610 all of the to-be-identified ATUs to minimize the gap  $\varepsilon\varepsilon^T$  between the predicted ATU expression profile  
611 and the genetic and intergenic region expression profile. Finally, the output of CQP is the predicted  
612 ATUs.

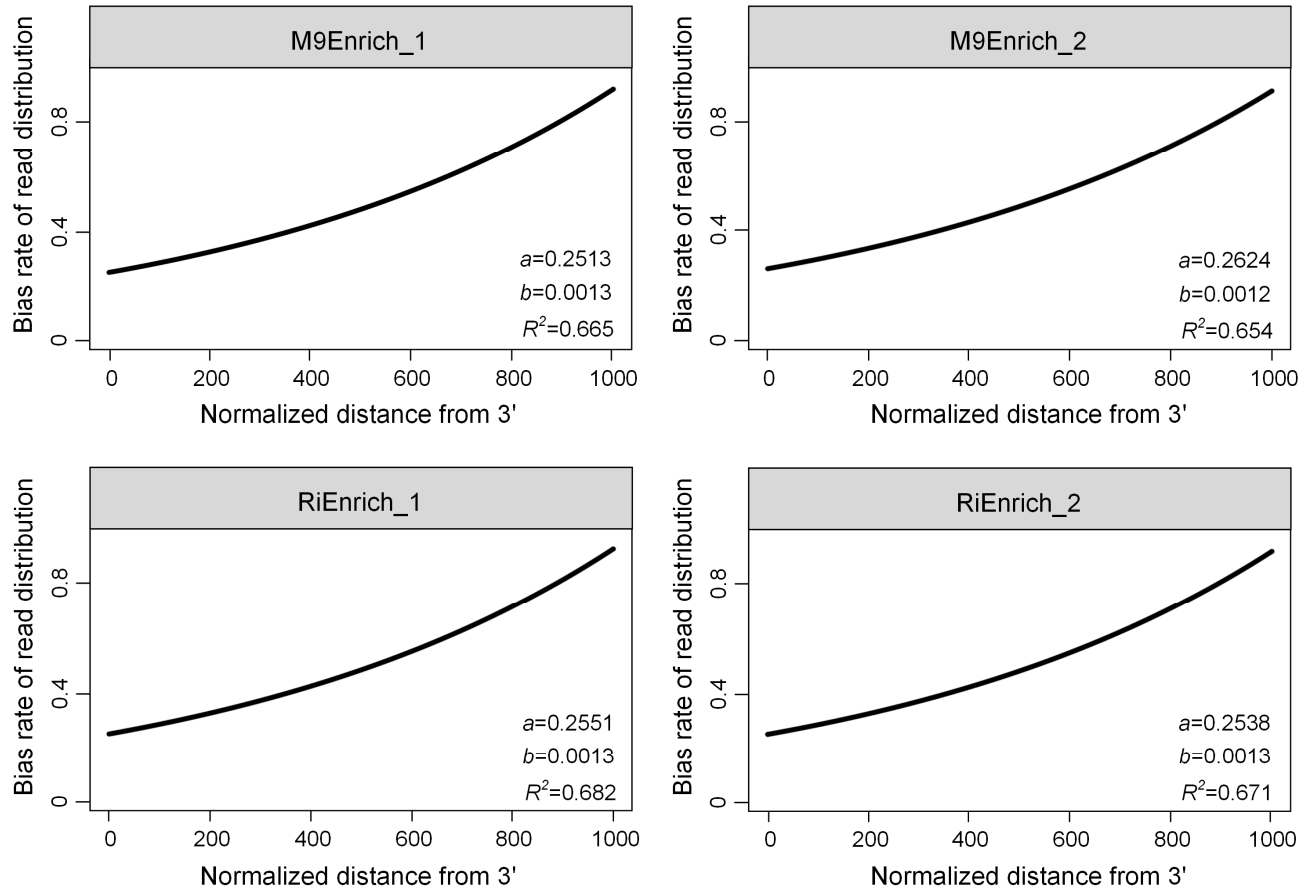

613

614 **Fig. 2. Results of modelling non-uniform read distribution along mRNA transcripts.** The four bias

615 rate functions ( $y = ae^{bx}$ ) by nonlinear regression had similar coefficients ( $a$  and  $b$ ) across the four

616 datasets M9Enrich\_1, M9Enrich\_2, RiEnrich\_1 and RiEnrich\_2.

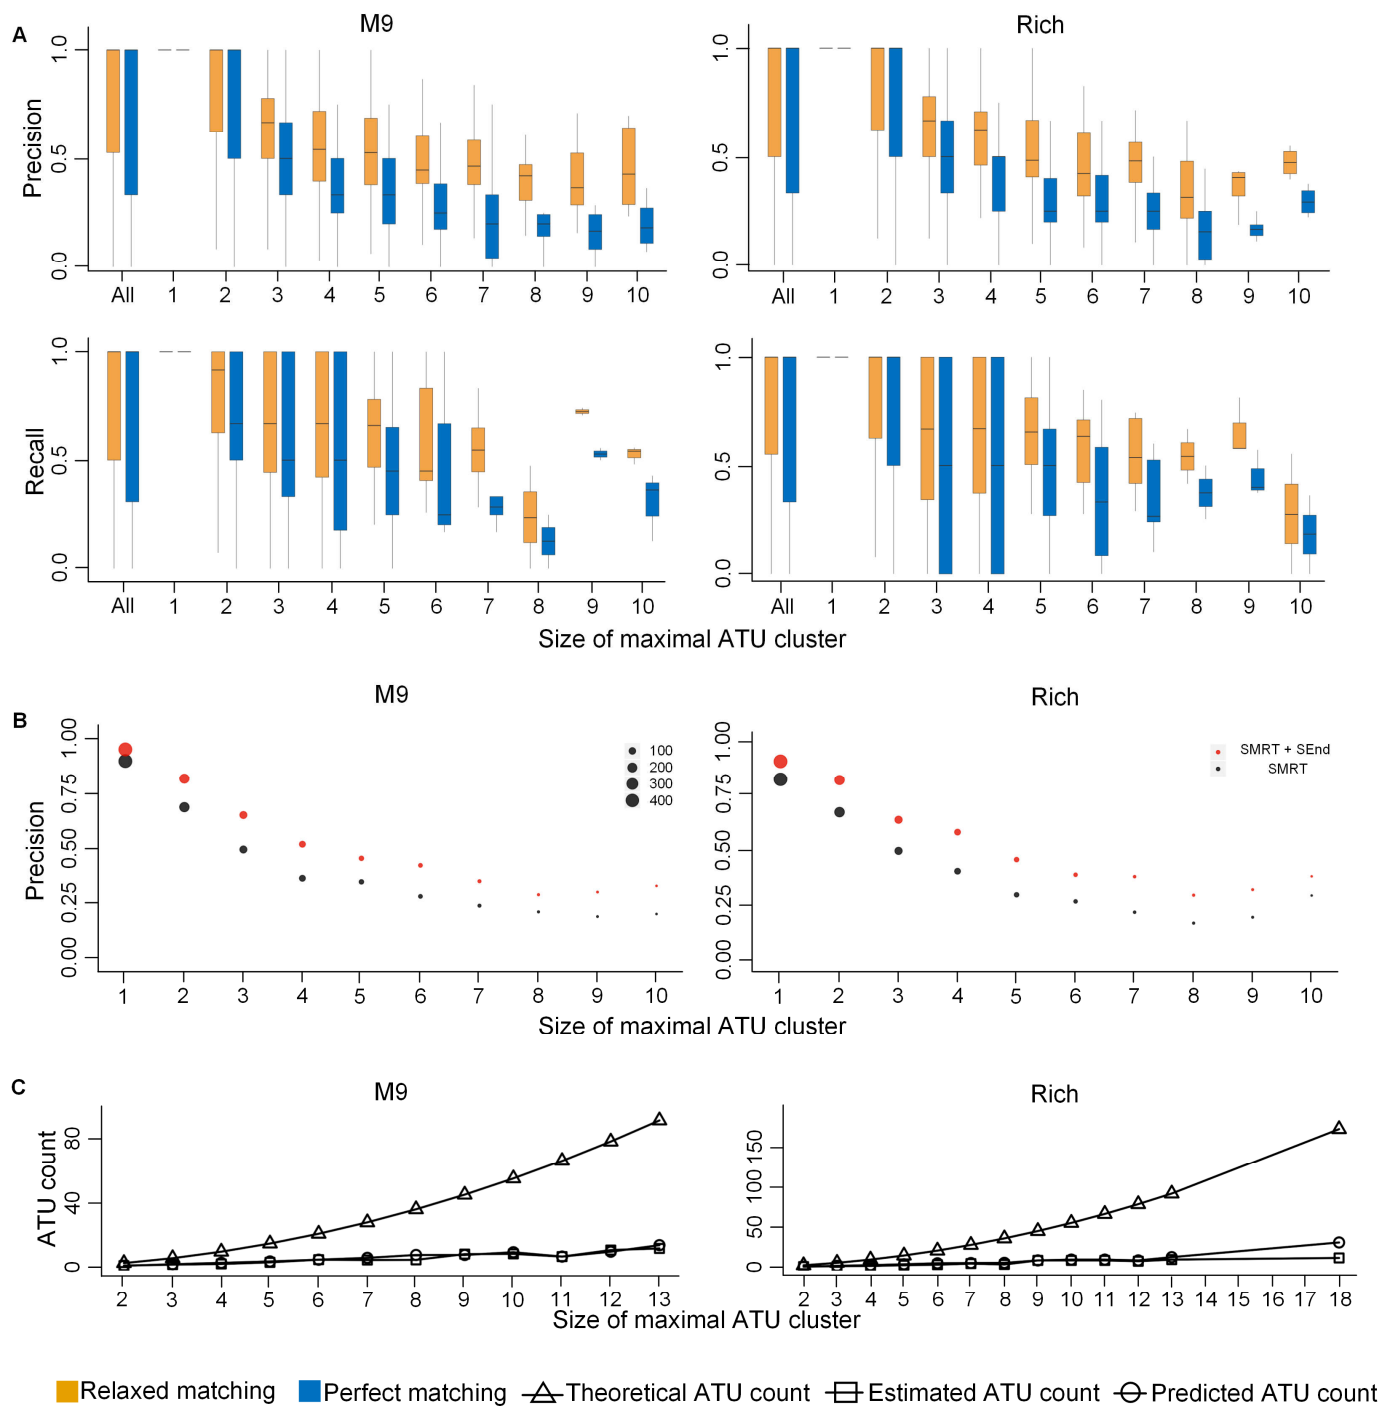

617

618 **Fig. 3. Overall evaluation results of SeqATU. (A)** Precision and recall based on perfect matching and

619 relaxed matching for M9Enrich\_Seq (left) and RiEnrich\_Seq (right) using evaluated ATUs from SMRT-

620 Cappable-seq. **(B)** Average precision based on perfect matching for M9Enrich\_Seq (left) and  
621 RiEnrich\_Seq (right) using evaluated ATUs from SMRT-Cappable-seq (black) and evaluated ATUs from  
622 SMRT-Cappable-seq and SEnd-seq (red). The magnitude of the point denotes the number of maximal  
623 ATU clusters with same size. **(C)** Average number of ATUs across different sizes of SMRT maximal  
624 ATU clusters for M9Enrich\_Seq (left) and RiEnrich\_Seq (right).

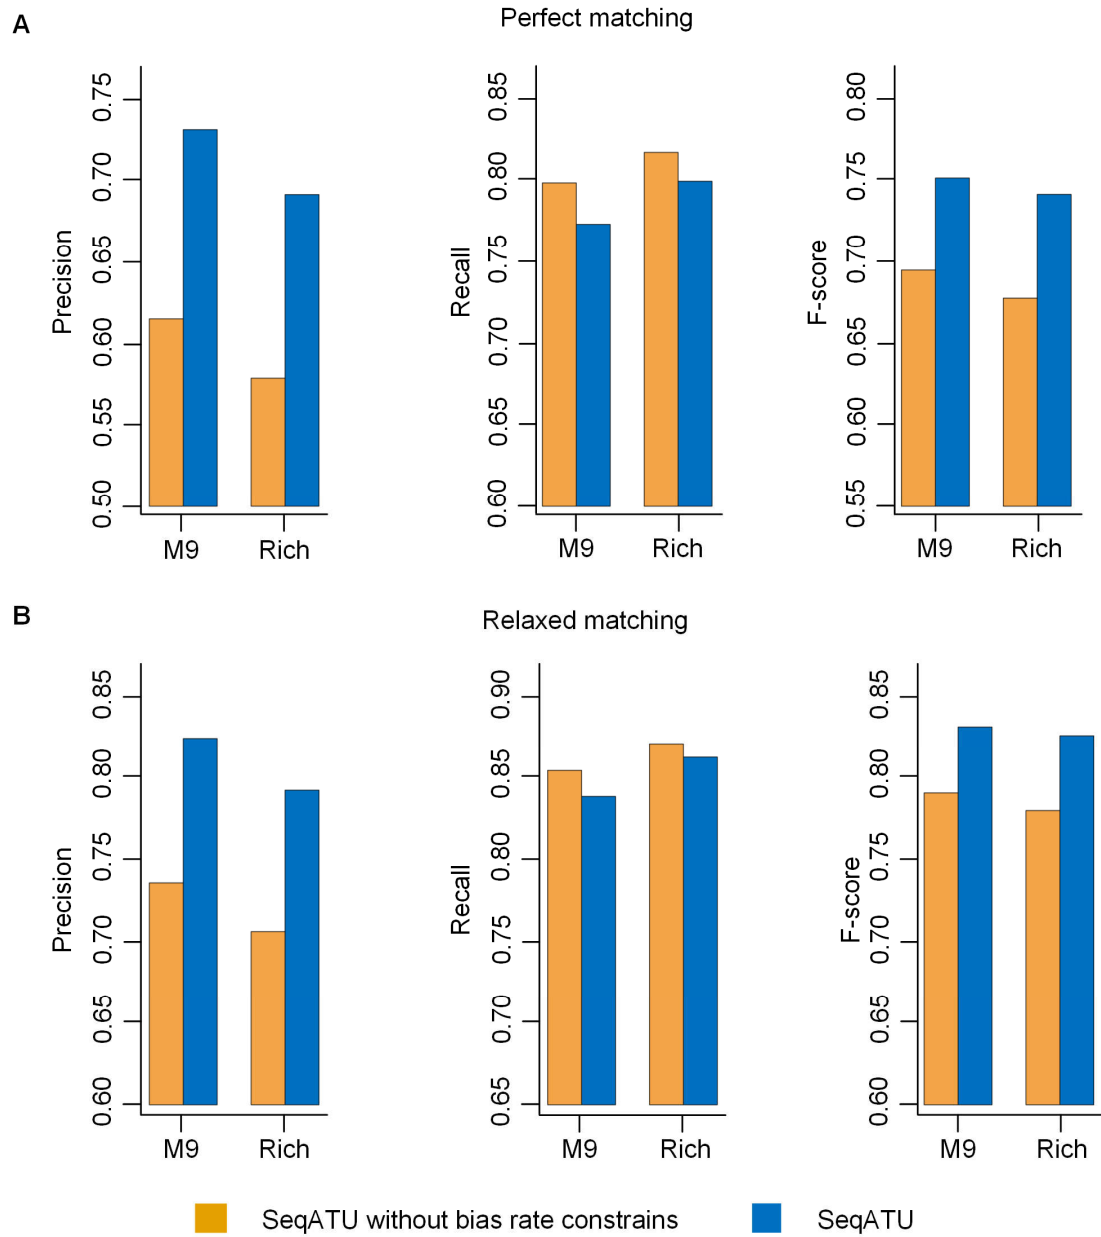

625

626

627

628

629

**Fig. 4. Comparative analysis of the performance between SeqATU and SeqATU without the bias rate constrains for SMRT maximal ATU clusters. (A) Precision, recall and F-score based on perfect matching for M9Enrich\_Seq and RiEnrich\_Seq. (B) Precision, recall and F-score based on relaxed matching for M9Enrich\_Seq and RiEnrich\_Seq.**



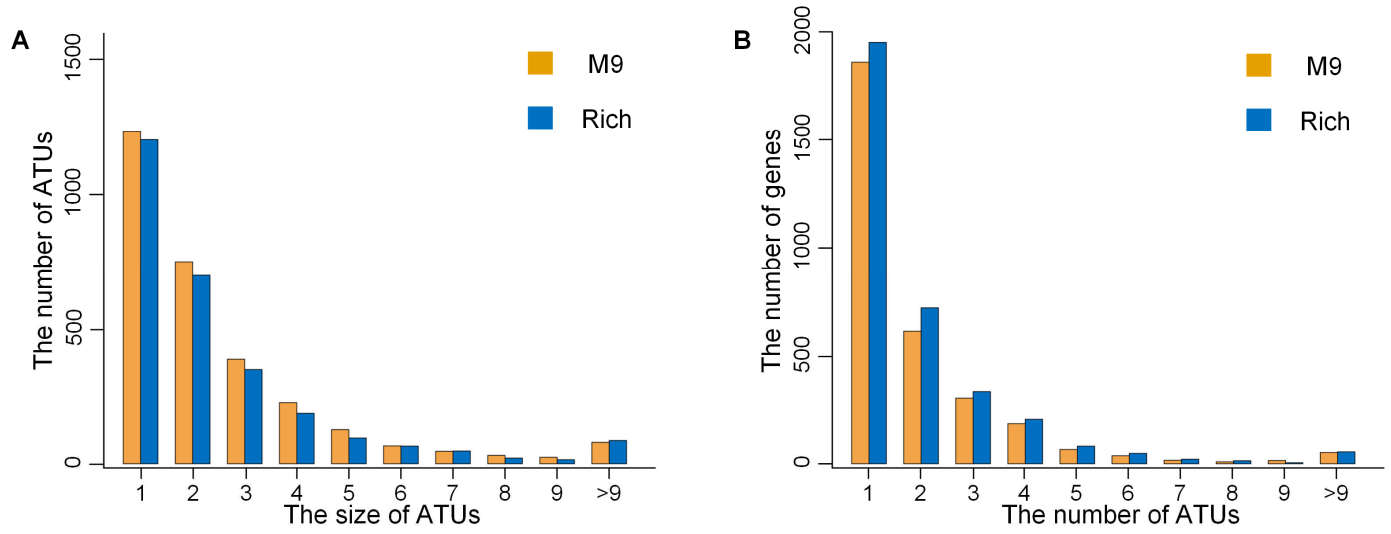

630

631 **Fig. 5. Comprehensive analysis of the predicted ATUs by SeqATU. (A)** Number of ATUs across

632 different sizes. The size of an ATU is the number of its component genes. **(B)** Distribution of the number

633 of ATUs per gene.

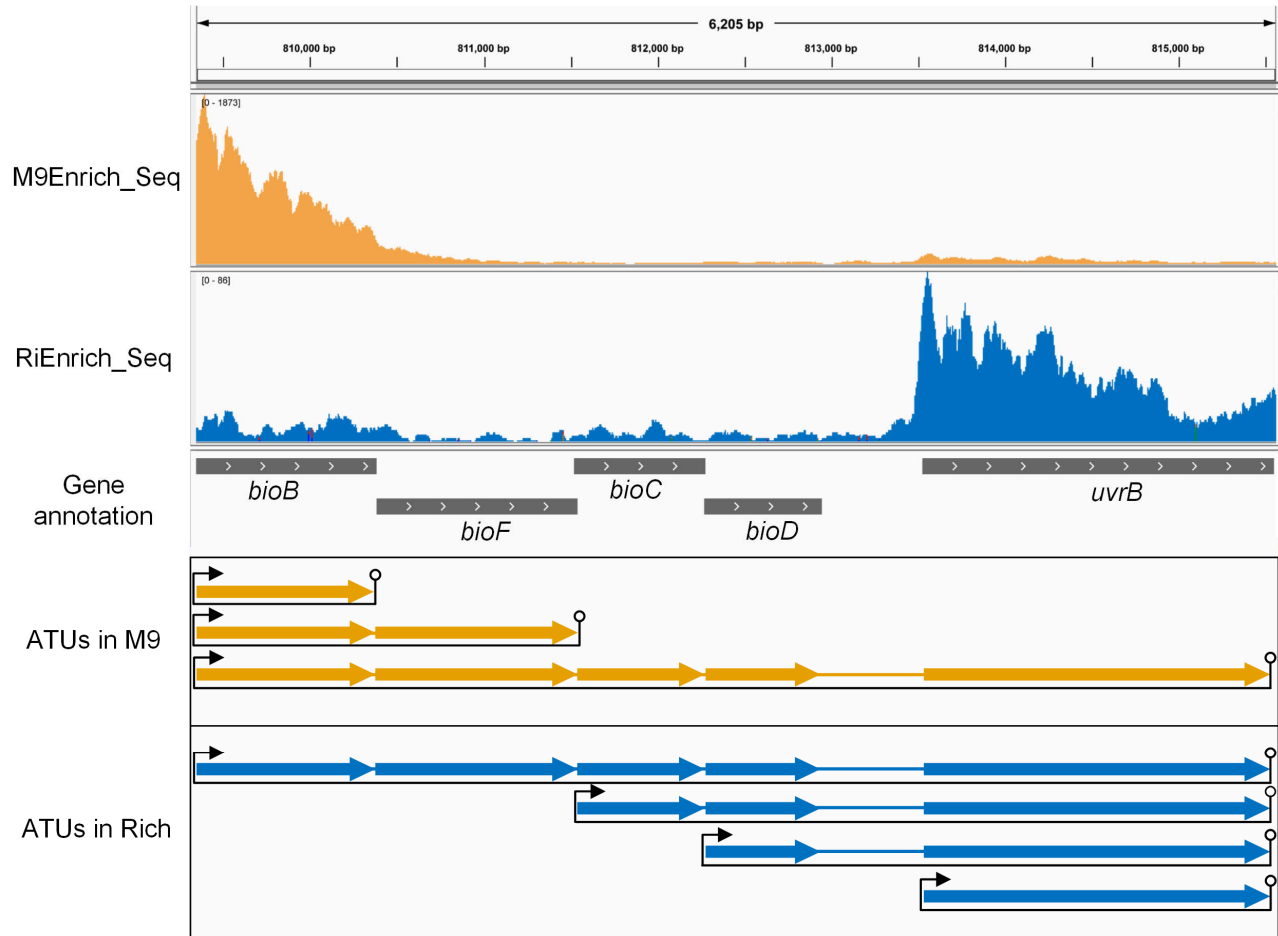

634

635 **Fig. 6. Integrative Genomics Viewer (IGV) representation of the mapping and ATUs.** Mapping and

636 ATUs of M9Enrich\_Seq (orange) and RiEnrich\_Seq (blue) were shown for the maximal ATU cluster

637 containing the *bioB*, *bioF*, *bioC*, *bioD* and *uvrB* genes.

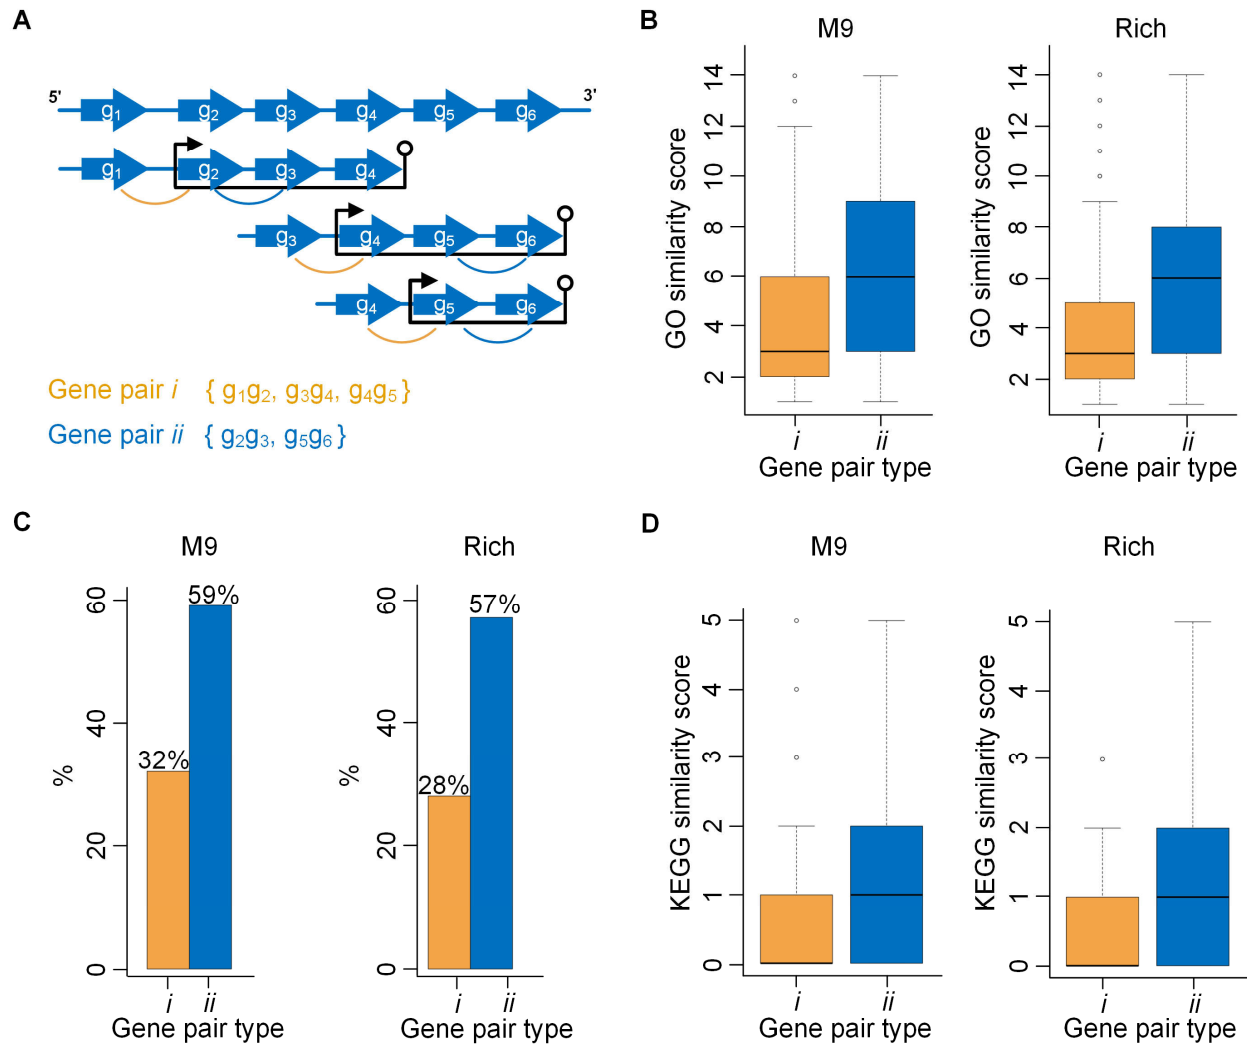

638

639 **Fig. 7. Interpretation and results of the functional relatedness of different gene pairs based on GO**  
 640 **and KEGG enrichment analyses. (A)** Illustration of two different gene pairs *i* and *ii*. **(B)** Functional  
 641 relatedness results based on GO enrichment analysis for M9Enrich\_Seq (left) and RiEnrich\_Seq (right).  
 642 **(C)** The proportion of two different gene pairs whose genes are contained in the same KEGG pathway  
 643 for M9Enrich\_Seq (left) and RiEnrich\_Seq (right). **(D)** The functional relatedness results based on  
 644 KEGG enrichment analysis for M9Enrich\_Seq (left) and RiEnrich\_Seq (right).
